# Supplementary material
Source: PubMed Central journal article supplement (PMC3557803)

# Supporting Information

## The Assignment of Pterin Deaminase Activity to an Enzyme of Unknown Function Guided by Homology Modeling and Docking<sup>†</sup>

Hao Fan<sup>a,b,c,§</sup>, Daniel S. Hitchcock<sup>‡,§</sup>, Ronald D. Seidel III<sup>ζ</sup>, Brandan Hillerich<sup>ζ</sup>, Henry Lin<sup>b</sup>, Steven C. Almo<sup>ζ</sup>, Andrej Sali<sup>a,b,c,\*</sup>, Brian K. Shoichet<sup>b,\*</sup>, and Frank M. Raushel<sup>‡,ψ,\*</sup>

<sup>a</sup>Department of Bioengineering and Therapeutic Sciences, <sup>b</sup>Department of Pharmaceutical Chemistry, and <sup>c</sup>California Institute for Quantitative Biosciences, University of California, San Francisco. <sup>‡</sup>Department of Biochemistry & Biophysics, <sup>ψ</sup>Department of Chemistry, Texas A&M University, College Station, Texas 77843. <sup>ζ</sup>Albert Einstein College of Medicine, 1300 Morris Park Avenue, Bronx, New York 10461.

### Compounds tested in Physical Library Screening.

**Table S1.** Virtual screening of the HEI database against the template structure 1K70.

**Table S2.** Functional homologues of Arad3529.

**Scheme S1.** A variety of pterins found to be deaminated by Arad3529.

**Figure S1.** Sequence alignment between Arad3529 and cytosine deaminase (PDB id: 1K70). The active site residues in 1K70 that are within 5 Å of the co-crystallized inhibitor, and the correspondingly aligned residues in Arad3529 are colored. The helices and strands in the catalytic domain of 1K70 structure were marked by red HHH and blue SSS, respectively.

**Figure S2.** Operon Context for Arad3529. Arrows indicate individual operons. Arad3529 is located on the same operon with TauC, GlcD, and MdaB. The proteins from cog1402, LysR, TauA, TauB and TauC are found on different operons but are conserved across several genomes with Arad3529 homologs. Sequences which likely code for metabolic proteins are drawn in color, whereas transporters and transcription regulators are in black.

## Compounds tested in Physical Library Screening:

**Docking predictions:** melamine, cytosine, thioguanine, guanine, adenine, 7-methylguanine, cytidine, 2'-deoxycytidine, pterin, biopterin, and neopterin.

**Substrates of known amidohydrolases:** guanosine, adenosine, 8-mercaptoguanine, 2,6-diaminopurine, xanthine, 8-oxoguanine, urate, 9-methylguanine, 6-chloropurine, 8-oxoadenine, isopentenyladenine, *N*6-methyladenine, 1-methyladenine, *cis*-zeatin, *trans*-zeatin, benzyladenine, 2-amino-6-benzylthiopurine, *N*-ethenopurine, *N*6-acyladenine, kinetin, *N*-dimethyladenine, *N*-butyladenine, isoguanine, 2-amino-6-methoxypurine, 6-methylthiopurine, 2-chloroadenine, 6-methoxyadenine, 6-mercaptopurine, 7-methyladenine, 2-dimethylaminoadenine, 3-iminisoindolinone, acycloguanosine, 2'-deoxyguanosine, xanthosine, 2'-deoxyadenosine, 3'-deoxyadenosine, 5'-deoxyadenosine, 2',5'-dideoxyadenosine, 5'-amino-5'-deoxyadenosine, 5'-chloro-5'-deoxyadenosine, 5'-deoxy-5'-methylthioadenosine, *S*-adenosylhomocysteine, *N*6-methyl-2'-deoxyadenosine, isoguanine, 2'-deoxyisoguanine, cytosine- $\beta$ -D-arabinofuranose, *N*-methylcytidine, 5-methyl-2'-deoxycytidine, 5-hydroxymethylcytidine, 2,4-diaminopyrimidine, 4,6-diaminopyrimidine, 4-amino-2,6-dihydroxypyrimidine, 2-amino-4,6-dihydroxypyrimidine, 5-methylcytosine, 5-hydroxymethylcytosine, 5-carboxycytosine, 5-aminocytosine, 5-fluorocytosine, 5-chlorocytosine, 4-hydroxy-2,5,6-triaminopyrimidine, *N*-methylcytosine, 3-methylcytosine, 2,6-diaminopyrimidine, 2,4,6-triaminopyrimidine, uracil, 5-aminouracil, 5-formyluracil, 5-fluorouracil, 3-oxauracil, 5-hydroxymethyluracil, 6-hydroxyaminouracil, thiamine, 2-aminopyrimidine, 4-aminopyrimidine, toxopyrimidine, sulfamonomethoxine, 4-thiouracil, 2-thiouracil, thymine, 5-azacytosine, ammeline, ammelide, cyanuric acid, 2-amino-4-hydroxy-6-chlorotriazine, cyromazin, *N*-ethylammeline, desethylatrazine, 6-azacytosine, 2-aminopyridine, 2,6-diaminopyridine, 4,6-diamino-2-hydroxypyridine, 4-aminopyridine, 4-dimethylaminopyridine, creatinine, 5-amino-4-imidazolecarboxamide, 5-hydantoin acetic acid, 3-amino-5-mercapto-1,2,4-triazole, 3-amino-5-carboxy-1,2,4-triazole, dihydrouracil, dihydrothymine, and dihydroorotate.

**Substituted pterins tested further:** 2,4-diamino-6-hydroxymethylpteridine, isoxanthopterin, pterin-6-carboxylate, sepiapterin, folate, formylpterin, pterin-7-carboxylate, hydroxymethylpterin, xanthopterin, 7,8-dihydrohydroxymethylpterin, and 7,8-dihydroneopterin.

**Table S1. Virtual screening of the HEI database against the template structure 1K70**

| Name             | KEGG ID | Rank |
|------------------|---------|------|
| cytosine         | C00380  | 10   |
| creatinine       | C00791  | 32   |
| 5-methylcytosine | C02376  | 48   |
| adenine          | C00147  | 50   |
| N6-methyladenine | C08434  | 59   |
| 2'-deoxycytosine | C02026  | 73   |
| guanine          | C00242  | 77   |
| toxopyrimidine   | C01279  | 126  |

We noted that 9 molecules received better docking ranks than cytosine. These molecules are all low molecular weight compounds and contain multiple ionizable groups, such as Biuret. Thus, these compounds are likely false positives, and were not selected for experimental validation with either the cytosine deaminase or Arad3529.

**Table S2. Functional homologues of Arad3529**

| Organism                                                         | Gi Number | Locus Tag          |
|------------------------------------------------------------------|-----------|--------------------|
| <i>Agrobacterium radiobacter</i> K84                             | 222086854 | Arad_3529          |
| <i>Agrobacterium tumefaciens</i> 5A                              | 358004348 | AT5A_20871         |
| <i>Agrobacterium vitis</i> S4                                    | 222149611 | Avi_3553           |
| <i>Agrobacterium vitis</i> S4                                    | 222106464 | Avi_5410           |
| <i>alpha proteobacterium</i> BAL199                              | 163793175 | BAL199_25339       |
| <i>Arthrospira maxima</i> CS-328                                 | 209525534 | AmaxDRAFT_2897     |
| <i>Arthrospira platensis</i> NIES-39                             | 291567086 | NIES39_C04920      |
| <i>Arthrospira platensis</i> str. Paraca                         | 284051729 | AplaP_010100009690 |
| <i>Arthrospira</i> sp. PCC 8005                                  | 376001956 | ARTHRO_1140019     |
| <i>Burkholderia multivorans</i> CGD2M                            | 221198870 | BURMUCGD2M_6445    |
| <i>Burkholderia xenovorans</i> LB400                             | 91780827  | Bxe_C0802          |
| <i>Chlorella variabilis</i>                                      | 307110611 | CHLNCDRAFT_34176   |
| <i>Comamonas testosteroni</i> ATCC 11996                         | 371450227 | CTATCC11996_23416  |
| <i>Crocospaera watsonii</i> WH 0003                              | 357261488 | CWATWH0003_4509    |
| <i>Crocospaera watsonii</i> WH 8501                              | 67924588  | CwatDRAFT_1740     |
| <i>Cyanobium</i> sp. PCC 7001                                    | 254432712 | CPCC7001_2605      |
| <i>Cyanothece</i> sp. ATCC 51142                                 | 172038506 | cce_3593           |
| <i>Cyanothece</i> sp. ATCC 51472                                 | 354554150 | Cy51472DRAFT_2251  |
| <i>Cyanothece</i> sp. CCY0110                                    | 126659334 | CY0110_06099       |
| <i>Cyanothece</i> sp. PCC 7424                                   | 218437242 | PCC7424_0235       |
| <i>Cyanothece</i> sp. PCC 7822                                   | 307151773 | Cyan7822_1898      |
| <i>Cyanothece</i> sp. PCC 8801                                   | 218246775 | PCC8801_1952       |
| <i>Cyanothece</i> sp. PCC 8802                                   | 257059817 | Cyan8802_1979      |
| <i>Dinoroseobacter shibae</i> DFL 12                             | 159043930 | Dshi_1381          |
| <i>Erwinia billingiae</i> Eb661                                  | 300717286 | EbC_27110          |
| <i>Gluconacetobacter oboediens</i> 174Bp2                        | 349687131 | Gobo1_010100008018 |
| <i>Gluconacetobacter</i> sp. SXCC-1                              | 330992835 | SXCC_02737         |
| <i>Hoeflea phototrophica</i> DFL-43                              | 163760226 | HPDFL43_08189      |
| <i>Hydrogenophaga</i> sp. PBC                                    | 388566070 | Q5W_0868           |
| <i>Jannaschia</i> sp. CCS1                                       | 89053965  | Jann_1474          |
| <i>Ketogulonicigenium vulgare</i> Y25                            | 310816506 | EIO_2064           |
| <i>Klebsiella oxytoca</i> 10-5246                                | 376395439 | HMPREF9690_02815   |
| <i>Klebsiella pneumoniae</i> 342                                 | 206580486 | KPK_2297           |
| <i>Klebsiella pneumoniae</i> KCTC 2242                           | 386035174 | KPN2242_13140      |
| <i>Klebsiella pneumoniae</i> subsp. <i>pneumoniae</i> HS11286    | 378979178 | KPHS_30190         |
| <i>Klebsiella pneumoniae</i> subsp. <i>pneumoniae</i> MGH 78578  | 152970585 | KPN_02036          |
| <i>Klebsiella pneumoniae</i> subsp. <i>pneumoniae</i> NTUH-K2044 | 238895079 | KP1_3111           |
| <i>Klebsiella</i> sp. 1_1_55                                     | 290509179 | HMPREF0485_00950   |
| <i>Klebsiella</i> sp. 4_1_44FAA                                  | 365137953 | HMPREF1024_00689   |

|                                                       |           |                     |
|-------------------------------------------------------|-----------|---------------------|
| <i>Klebsiella sp. MS 92-3</i>                         | 330015330 | HMPREF9538_05868    |
| <i>Klebsiella variicola At-22</i>                     | 288935109 | Kvar_2241           |
| <i>Labrenzia aggregata IAM 12614</i>                  | 118592963 | SIAM614_02036       |
| <i>Labrenzia alexandrii DFL-11</i>                    | 254501071 | ADFL11_1107         |
| <i>Lyngbya sp. PCC 8106</i>                           | 119485483 | L8106_10086         |
| <i>Mesorhizobium alhagi CCNWXJ12-2</i>                | 359791086 | MAXJ12_16641        |
| <i>Mesorhizobium amorphae CCNWGS0123</i>              | 357026772 | MEA186_18497        |
| <i>Mesorhizobium australicum WSM2073</i>              | 354569803 |                     |
| <i>Mesorhizobium ciceri biovar biserrulae WSM1271</i> | 319783022 | Mesci_3325          |
| <i>Mesorhizobium loti MAFF303099</i>                  | 14022090  | mll1290             |
| <i>Mesorhizobium loti MAFF303099</i>                  | 161621451 | mll1290             |
| <i>Mesorhizobium opportunistum WSM2075</i>            | 337268293 | Mesop_3816          |
| <i>Methylobacterium chloromethanicum CM4</i>          | 218530001 | Mchl_2042           |
| <i>Methylobacterium extorquens AM1</i>                | 240138303 | MexAM1_META1p1649   |
| <i>Methylobacterium extorquens DM4</i>                | 254560845 | METDI2397           |
| <i>Methylobacterium extorquens DSM 13060</i>          | 373564592 | MetexDRAFT_4416     |
| <i>Methylobacterium extorquens PA1</i>                | 163851150 | Mext_1723           |
| <i>Methylobacterium populi BJ001</i>                  | 188580356 | Mpop_1091           |
| <i>Microcoleus chthonoplastes PCC 7420</i>            | 254410796 | MC7420_274          |
| <i>Microcoleus vaginatus FGP-2</i>                    | 334120965 | MicvaDRAFT_2986     |
| <i>Microcystis aeruginosa NIES-843</i>                | 166363277 | MAE_05360           |
| <i>Microcystis aeruginosa PCC 7806</i>                | 159026135 | IPF_4829            |
| <i>Microcystis aeruginosa PCC 7941</i>                | 389764552 | MICAD_400012        |
| <i>Microcystis aeruginosa PCC 9432</i>                | 389677661 | MICCA_3050004       |
| <i>Microcystis aeruginosa PCC 9443</i>                | 389731332 | MICAC_5760002       |
| <i>Microcystis aeruginosa PCC 9701</i>                | 389881376 | MICAK_3820002       |
| <i>Microcystis aeruginosa PCC 9717</i>                | 389716015 | MICAB_6620002       |
| <i>Microcystis aeruginosa PCC 9806</i>                | 389790346 | MICAE_2140020       |
| <i>Microcystis aeruginosa PCC 9807</i>                | 389802797 | MICAF_3630004       |
| <i>Microcystis aeruginosa PCC 9808</i>                | 389824008 | MICAG_3490012       |
| <i>Microcystis aeruginosa PCC 9809</i>                | 389834001 | MICAH_1010004       |
| <i>Microcystis sp. T1-4</i>                           | 390441413 | MICAI_4010001       |
| <i>Micromonas pusilla CCMP1545</i>                    | 303279224 | MICPUCDRAFT_58167   |
| <i>Moorea producta 3L</i>                             | 332707052 | LYNGBM3L_26730      |
| <i>Ochrobactrum anthropi ATCC 49188</i>               | 153011192 | Oant_3872           |
| <i>Octadecabacter antarcticus 307</i>                 | 254436998 | OA307_1868          |
| <i>omamonas testosteroni KF-1</i>                     | 221070037 |                     |
| <i>Opitutaceae bacterium TAV1</i>                     | 390121479 | ObacTA_020100014809 |
| <i>Opitutaceae bacterium TAV5</i>                     | 373851669 |                     |
| <i>Ostreococcus lucimarinus CCE9901</i>               | 145349453 | OSTLU_42867         |
| <i>Ostreococcus tauri</i>                             | 308806984 | Ot08g02330          |
| <i>Pantoea sp. aB</i>                                 | 304397339 | PanABDRAFT_2477     |
| <i>Pantoea sp. At-9b</i>                              | 317046647 | Pat9b_0413          |

|                                                                    |           |                    |
|--------------------------------------------------------------------|-----------|--------------------|
| <i>Paulinella chromatophora</i>                                    | 194476571 | PCC_0086           |
| <i>Polymorphum gilvum</i> SL003B-26A1                              | 328542414 | SL003B_0794        |
| <i>Prochlorococcus marinus</i> str. MIT 9211                       | 159903893 | P9211_13521        |
| <i>Prochlorococcus marinus</i> str. MIT 9301                       | 126696828 | P9301_14901        |
| <i>Prochlorococcus marinus</i> str. MIT 9303                       | 124023689 | P9303_19891        |
| <i>Prochlorococcus marinus</i> str. MIT 9312                       | 78779784  | PMT9312_1400       |
| <i>Prochlorococcus marinus</i> str. MIT 9313                       | 33862599  | PMT0326            |
| <i>Prochlorococcus marinus</i> str. NATL1A                         | 124026429 | NATL1_17241        |
| <i>Prochlorococcus marinus</i> str. NATL2A                         | 72382709  | PMN2A_0870         |
| <i>Prochlorococcus marinus</i> subsp. <i>marinus</i> str. CCMP1375 | 33240827  | Pro1378            |
| <i>Pseudomonas</i> sp. ADP                                         | 32455877  | pADP-1_p093        |
| <i>Rahnella aquatilis</i> CIP 78.65 = ATCC 33071                   | 383189811 | Rahaq2_1935        |
| <i>Rahnella</i> sp. Y9602                                          | 322832607 | Rahaq_1889         |
| <i>Rhizobium etli</i> CFN 42                                       | 86281764  | RHE_CH02043        |
| <i>Rhizobium etli</i> CFN 42                                       | 162329640 | RHE_CH02043        |
| <i>Rhizobium etli</i> CIAT 652                                     | 190894434 | RHECIAT_PC0000096  |
| <i>Rhizobium etli</i> CNPAF512                                     | 327188280 | RHECNPAF_9300154   |
| <i>Rhizobium leguminosarum</i> bv. <i>trifolii</i>                 | 1439551   |                    |
| <i>Rhizobium leguminosarum</i> bv. <i>trifolii</i> WSM1325         | 241113027 | Rleg_4666          |
| <i>Rhizobium leguminosarum</i> bv. <i>trifolii</i> WSM2304         | 209549272 | Rleg2_1675         |
| <i>Rhizobium leguminosarum</i> bv. <i>trifolii</i> WSM597          | 392850220 | Rleg9DRAFT_1550    |
| <i>Rhizobium leguminosarum</i> bv. <i>trifolii</i> WU95            | 392515184 | Rleg8DRAFT_0280    |
| <i>Rhizobium leguminosarum</i> bv. <i>viciae</i> 3841              | 116255810 | pRL110609          |
| <i>Rhizobium leguminosarum</i> bv. <i>viciae</i> 3841              | 116248977 | pRL120308          |
| <i>Rhizobium</i> sp. PDO1-076                                      | 375053111 | PDO_3140           |
| <i>Roseobacter denitrificans</i> OCh 114                           | 110678617 | RD1_1293           |
| <i>Ruegeria</i> sp. TM1040                                         | 99078030  | TM1040_3052        |
| <i>Serratia odorifera</i> 4Rx13                                    | 270262662 | SOD_c02830         |
| <i>Serratia</i> sp. M24T3                                          | 383816172 | SPM24T3_17475      |
| <i>Starkeya novella</i> DSM 506                                    | 298292809 | Snov_2842          |
| <i>Synechococcus elongatus</i> PCC 6301                            | 56750963  | syc0954_d          |
| <i>Synechococcus elongatus</i> PCC 7942                            | 81299379  | Synpcc7942_0568    |
| <i>Synechococcus</i> sp. BL107                                     | 116072321 | BL107_11056        |
| <i>Synechococcus</i> sp. CB0101                                    | 318040418 | SCB01_010100001875 |
| <i>Synechococcus</i> sp. CB0205                                    | 317970568 | SCB02_010100013621 |
| <i>Synechococcus</i> sp. CC9311                                    | 113953404 | sync_0740          |
| <i>Synechococcus</i> sp. CC9605                                    | 78212398  | Syncc9605_0854     |
| <i>Synechococcus</i> sp. CC9902                                    | 78185105  | Syncc9902_1538     |
| <i>Synechococcus</i> sp. JA-2-3B'a(2-13)                           | 86608541  | CYB_1063           |
| <i>Synechococcus</i> sp. JA-3-3Ab                                  | 86606230  | CYA_1567           |
| <i>Synechococcus</i> sp. PCC 7335                                  | 254421902 | S7335_2052         |
| <i>Synechococcus</i> sp. RS9916                                    | 116073349 |                    |

|                                          |           |                   |
|------------------------------------------|-----------|-------------------|
| <i>Synechococcus</i> sp. RS9917          | 87125519  | RS9917_02061      |
| <i>Synechococcus</i> sp. WH 5701         | 87302978  | WH5701_07386      |
| <i>Synechococcus</i> sp. WH 5701         | 87303856  | WH5701_16173      |
| <i>Synechococcus</i> sp. WH 7803         | 148240087 | SynWH7803_1751    |
| <i>Synechococcus</i> sp. WH 7805         | 88809157  | WH7805_05676      |
| <i>Synechococcus</i> sp. WH 8016         | 352096259 | Syn8016DRAFT_2486 |
| <i>Synechococcus</i> sp. WH 8102         | 33866172  |                   |
| <i>Synechococcus</i> sp. WH 8109         | 260436186 | SH8109_1371       |
| <i>Synechocystis</i> sp. PCC 6803        | 16330119  | slr1237           |
| <i>Trichodesmium erythraeum</i> IMS101   | 113477958 | Tery_4570         |
| <i>Variovorax paradoxus</i> EPS          | 319796039 | Varpa_5413        |
| <i>Variovorax paradoxus</i> EPS          | 319796483 | Varpa_5860        |
| <i>Variovorax paradoxus</i> S110         | 239817717 | Vapar_4756        |
| <i>Variovorax paradoxus</i> S110         | 239818099 | Vapar_5141        |
| <i>Verminephrobacter eiseniae</i> EF01-2 | 121610081 | Veis_3139         |

---

Scheme S1.

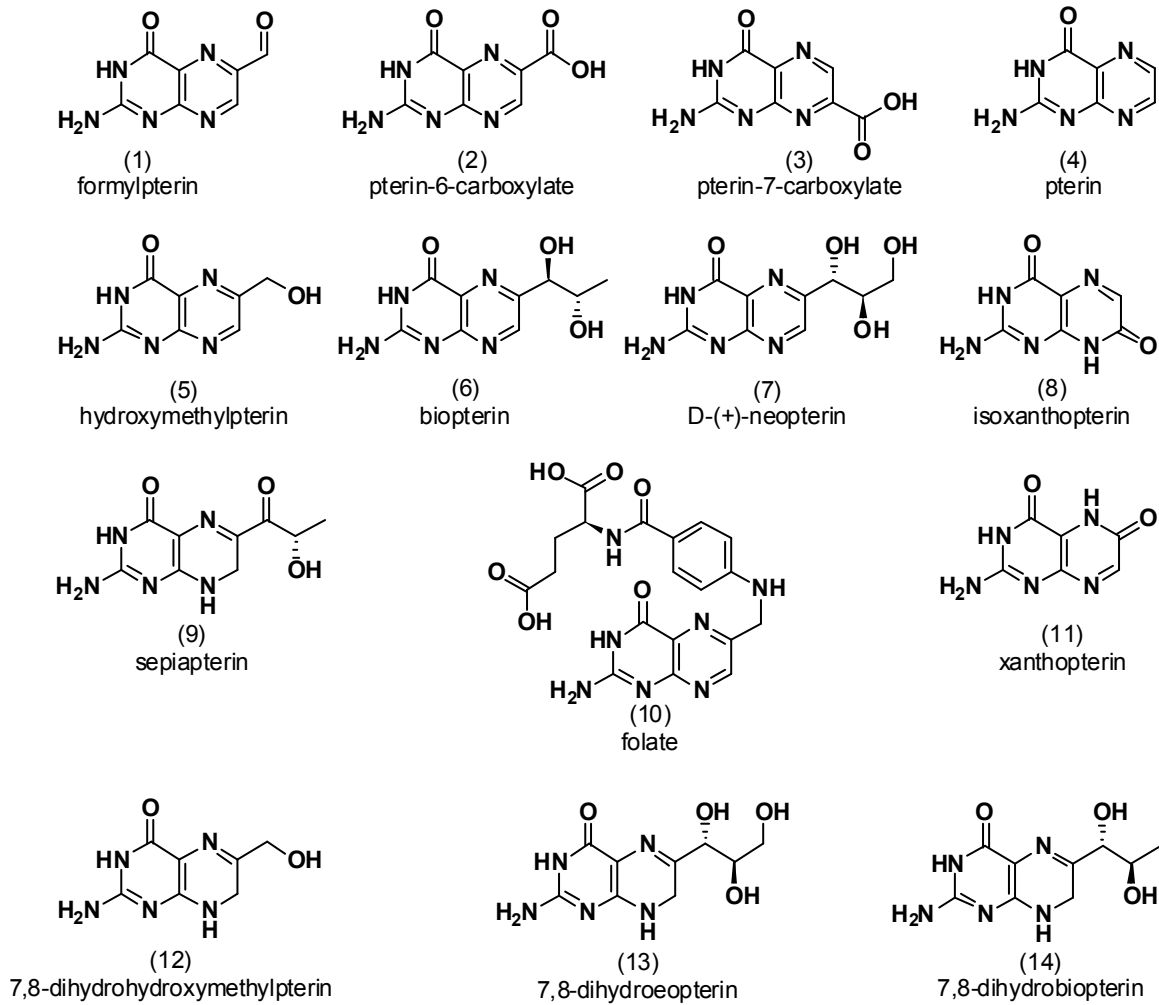





**Figure S2.**

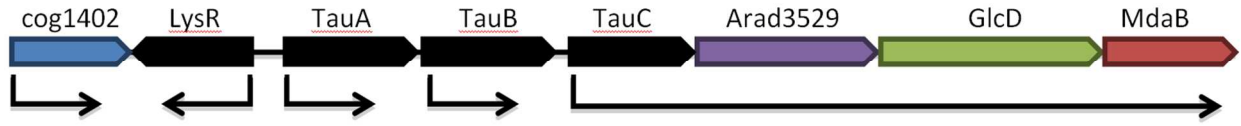

Supplement: NIHMS432704-supplement-1_si_001.pdf [file NIHMS432704-supplement-1_si_001.pdf]
